# Supplementary material for: Cell-sized liposome doublets reveal active tension build-up driven by acto-myosin dynamics
Source: Royal Society of Chemistry journal article supplement (doi:10.1039/c6sm00856a), 2016-01-01
Supplement: c6sm00856a2.xlsx [file c6sm00856a2.xlsx]

## Sheet: Sheet1
	Teta [degree]
	Bare Doublets		Actin 15min		Actin 30min		Actin 60min		Myo 15min		Myo 30min		Myo 60min
Exp1	69.2464	Exp1	35.6871	Exp1	52.8855	Exp1	38.1438	Exp1	48.5918	Exp1	56.48	Exp1	41.3011
	14.0523		46.5776		36.1763		58.4982		41.3011		53.6884		43.6314
	23.3353		42.4088		35.7341		43.4671		65.5073		55.2094		53.1317
	55.0664		53.9056		42.2439		54.04		7.46981		53.1205		58.2134
	21.2114		43.3367		43.8871		58.1408		36.871		60.3907		59.3183
	53.4287		52.7196		47.5859		39.8043		43.6314		54.1721		54.0975
	51.1798		60.8252		53.1317		55.114		35.4516		55.3599		42.0683
	50.6798		39.0215		53.1317		40.6862		41.3011		40.4658		48.5918
	14.5726		47.543		49.4657		59.051		40.5428		39.0285		54.0975
	34.9118		31.8863		60.4604		46.3614				50.4324		54.0975
	35.677		42.9821		39.793		37.9097	Exp2	60.4604		51.0894		43.6314
	66.479						36.1723		68.4368		47.0997		53.1317
	69.0532	Exp2	36.9915	Exp2	38.3173		26.5489		58.2134		56.1109		58.2134
	41.2325		40.8902		42.8449		47.8088		54.0975		51.9383		70.0536
	45.8663		36.1236		39.793		41.594		68.4368				52.187
	36.2646		45.6506		47.7328		43.8796		36.1581	Exp2	48.8073		55.0864
	47.8949		33.1133		52.187		58.8651		29.3414		53.6576		48.5918
	62.85		49.5947		50.3554		47.3484		22.9552		51.1215		59.3183
	28.3472		44.8802		60.4604		43.6378				60.5251		46.0558
	40.6938		50.8321		41.3011		51.0592	Exp3	46.8878		54.6258		51.2621
	62.3026		44.7879		43.6314				31.3332		46.1049		48.5918
	44.7501		36.5613		20.4879	Exp2	57.9029		44.4898		40.8996
	58.3878				48.5918		59.7433		38.3112		45.2929	Exp2	68.4368
	46.6035				60.4604		49.8227		57.3556		48.2438		60.4604
	35.7687				49.4657		28.2595		46.9902		62.4712		44.4283
	30.7647				46.0558		30.1959		39.6474		59.7873		46.8878
	46.4702				51.2621		55.6162		38.3978		61.8503		48.5918
	46.4037				55.0864		56.6772		35.7318		58.9494		28.6863
	15.7183						61.4962				42.9479		52.187
	65.3695			Exp3	41.3011		48.0657	Exp4	49.5136		50.9213		55.0864
	58.1265				39.793		55.4626		53.3762				45.2362
	35.4727				53.1317		48.9143		42.5724				48.5918
	38.3976				60.4604		33.7979		41.1376				52.187
					44.4283		40.8244		36.4159				52.187
Exp2	44.7986				42.8449		45.9164		50.3886				60.4604
	36.5922				20.4879		58.3504		46.8439				64.16
	27.1816				39.793		52.7671		49.5131				59.3183
	28.8039				44.4283		59.8725		66.1108				56.1004
	55.398				32.0064		51.0475		49.4331				55.0864
	47.8608				58.2134		42.4896						36.1581
	52.0285				54.0975		54.4892						58.2134
	35.8464				39.0513		46.2431						50.3554
	44.4524						47.4023						64.16
	45.9981						50.7026						48.5918
	43.6076						48.8621						46.8878
	31.6019												56.1004
	55.4889					Exp3	52.9219						56.1004
	43.3786						57.3569						54.0975
	54.8668						61.1269						54.0975
	41.6375						55.1101						65.5073
	47.7584						57.7505						53.1317
	28.4253						50.67						48.5918
	38.5513						44.9339						40.5428
	38.0548						38.8063						61.6442
	39.7036						50.8452						53.1317
	41.0043						47.7328						55.0864
	35.9242						56.1004						59.3183
	43.0641						58.2134						51.2621
	41.2782						36.871						36.871
	54.0194						37.5906						45.2362
	59.4308						12.1227						58.2134
	22.8743						31.3332						47.7328
	33.0667						34.0568						50.3554
	32.5418						50.3554						54.0975
	24.1114						30.6647						58.2134
	40.936						30.0009						55.0864
	36.2859						41.3011						60.4604
	37.54						42.8449						51.2621
	42.3933						50.3554
	53.6795
	39.1842
	43.0955
	46.6202
	41.8526
Exp3	59.0606
	32.7377
	33.1458
	45.5476
	49.7874
	35.204
	50.7762
	41.4051
	43.6868
	56.427
	28.4793
	36.0069
	28.4186
	46.1532
	27.8924
	46.3471
	35.6924
	64.5497
	37.5651
	44.1615
	32.6044
	41.3281
	29.3415
	32.0992
	30.5827
	56.1004
	26.7445
	42.0683
	60.4604
	57.1418
	52.187
	22.3343
	37.5906
	48.5918
	46.0558
	49.4657
