# Supplementary material for: Cell-sized liposome doublets reveal active tension build-up driven by acto-myosin dynamics
Source: Royal Society of Chemistry journal article supplement (doi:10.1039/c6sm00856a), 2016-01-01
Supplement: c6sm00856a3.xlsx [file c6sm00856a3.xlsx]

## Sheet: Sheet1
	Tension [N/m]
	Liposomes		Doublets
Exp1	9.97e-07	Exp1	2.27e-07
	2.21e-06		3.74e-07
	1.4e-06		6.74e-07
	2.7e-07
	4.63e-07	Exp2	1.39e-06
			3.21e-07
Exp2	2.23e-07		2.29e-06
	4.15e-07
	5.53e-07	Exp3	4.81e-07
	2.86e-06		5.64e-07
	1.04e-06
		Exp4	1.12e-06
Exp3	1.08e-06		2.59e-06
	1.14e-06
	1.61e-06	Exp5	1.16e-06
	1.4e-06		1.62e-06
Exp4	1.79e-06
	4.05e-06
	1.11e-06
	2.05e-07
Exp5	1.64e-06
	6.51e-07
	2.2e-07
	1.71e-06
